# Supplementary material for: Jahn-Teller distortion and dissociation of CCl4+ by transient X-ray spectroscopy simultaneously at the carbon K- and chlorine L-edge
Source: Chem Sci. 2022 Jul 19;13(32):9310–20. doi: 10.1039/d2sc02402k (PMC9384822; doi:10.1039/d2sc02402k)
Supplement: SC-013-D2SC02402K-s001 [file SC-013-D2SC02402K-s001.xlsx]

## Sheet: Energies
Relative energies (in eV)	HF	MP2	CCSD	CCSD(T)	wB97M-V	ZPE/wB97M-V	CCSD(T)+ZPE	wB97M-V+ZPE	Notes
CCl3plus+Cl	0	0	0	0	0	0	0	0	Reference point, all relative energies defined vs this
TS between covalently bonded cation and noncovalent complex	1.169	0.363	0.524	0.357	0.319	-0.006	0.351	0.314
Neutral CCl4	-9.395	-11.37	-11.052	-11.173	-10.983	0.028	-11.145	-10.955
CCl4plus covalently bonded	1.33	0.004	0.354	0.164	0.145	0.015	0.179	0.16
CCl4plus non covalent complex (global minimum)	-0.041	-0.181	-0.142	-0.162	-0.156	0.009	-0.153	-0.147
CCl4plus non covalent complex (planar local minimum)	-0.043	-0.148	-0.121	-0.137	-0.125	0.008	-0.13	-0.117
CCl4plus (Franck-Condon, Td neutral CCl4 geometry)	1.681	0.935	0.904	0.656	0.546	-0.071	0.585	0.474
CCl3+Clplus	3.776	5.045	4.735	4.887	5.03	-0.04	4.847	4.989
CCl3plus+Clplus	11.764	12.962	12.931	12.994	12.98	0	12.994	12.98
CCl3+Cl	-7.988	-7.917	-8.196	-8.107	-7.95	-0.04	-8.148	-7.99
Vertical IP of CCl4 (in eV)
Single ionization	11.075	12.306	11.955	11.829	11.529	-0.099	11.73	11.43
Double ionization	26.863	28.282	28.289	28.185	27.744	-0.011	28.174	27.733
IP of Cl (in eV)	11.7641	12.9617	12.9311	12.9942	12.9796	0	12.9942	12.9796
IP of CCl3 (in eV)	7.98846	7.9166	8.19601	8.10714	7.95002	0.0404154	8.14755	7.99044
Barriers (in eV)
Covalently bonded to Non-Covalent complex	-0.16	0.36	0.17	0.193	0.174	-0.021	0.172	0.154
Note: HF, MP2 and CCSD energies are provided for context, but are not expected to be as accurate as CCSD(T)
